# Supplementary material for: The Leukemic IDH1/2 Mutations Impair Myeloid and Erythroid Cell Differentiation of Primary Human Hematopoietic Stem and Progenitor Cells (HSPC): Experimental Evidences and a Review of the Literature
Source: Preprints.org preprint supplement (doi:10.20944/preprints202406.1723.v1), 2024-06-25
Supplement: Supplementary file 1 [file supplementary]

*Article*

**The leukemic *IDH1/2* mutations impair myeloid and erythroid cell differentiation of primary human hematopoietic stem and progenitor cells (HSPC): experimental evidences and a review of the literature.**

**Sara Pierangeli1&, Serena Donnini1&, Valerio Ciaurro2, Francesca Milano1, Valeria Cardinali1,3, Sofia Sciabolacci3, Gaetano Cimino1,3, Ilaria Gionfriddo1, Roberta Ranieri1, Sabrina Cipriani1, Eleonora Padiglioni1, Roberta Iacucci Ostini3, Tiziana Zei3, Antonio Pierini1,3 and Maria Paola Martelli1,3***

1 Hematology and Clinical Immunology Section, Department of Medicine and Surgery, Center for Hemato-Oncological Research (CREO), University of Perugia, Perugia, Italy;

2 MD Anderson Cancer Center, University of Texas, Texas, USA

3 Hematology Department, ‘Santa Maria della Misericordia’ Perugia Hospital, Perugia, Italy

***** Correspondence: maria.martelli@unipg.it

& These authors contributed equally to this work

**Table S1.** Experimental conditions of HSPC CD34+ cells from 13 healthy donors

| ***IDH1*** | **DONORS** | **CONDITIONS** | | | | |
| --- | --- | --- | --- | --- | --- | --- |
| EMPTY | WT | WT+AG-120 | R132H | R132H+AG-120 |
| Donor 1 | x | x | x | x | x |
| Donor 2 | x | x | x | x | x |
| Donor 3 | x | x | x | x | x |
| Donor 4 | x | x |  | x |  |
| Donor 5 | x | x |  | x |  |
| Donor 6 | x | x |  | x |  |
| Donor 7 | x |  |  | x |  |
|  |  |  |  |  |  |  |
| ***IDH2*** | **DONORS** | **CONDITIONS** | | | | |
| EMPTY | WT | WT+AG-221 | R140Q | R140Q+AG-221 |
| Donor 8 | x | x | x | x | x |
| Donor 9 | x | x | x | x | x |
| Donor 10 | x | x | x | x | x |
| Donor 11 | x | x | x | x | x |
| Donor 12 | x | x |  | x |  |
| Donor 13 | x | x |  | x |  |

**Figure S1.** Flow cytometry-based **s**orting strategy for human CD34+ transduced with *IDH* transgene. Example of dot plot related to *IDH1* experimental set generated by cell sorter software. Each plot illustrates FSC/SSC physical parameters (up), CD34 positivity (down/left) and ZsGreen1 positivity (down/right) concerning empty vector (left panel), wild-type gene (middle panel) and mutated gene (right panel). Transduced bright ZsGreen1+/CD34+ double positive cells gated in P4 were sorted for CFU assay.
